# Supplementary material
Source: MDPI journal article supplement (https://www.mdpi.com/2297-8739/9/11/347)
Supplement: s1 [file s1 › separations-1989641-supplementary.pdf]

## Supplementary File

# Development and Validation of an HPLC-FLD Method for the Determination of NDMA and NDEA Nitrosamines in Lisinopril Using Pre-Column Denitrosation and Derivatization Procedure

Eleni Tsanaktsidou, Lamprini Kanata, Sofia Almpani, Constantinos K. Zacharis and Catherine K. Markopoulou \*

Laboratory of Pharmaceutical Analysis, Department of Pharmacy, Aristotle University of Thessaloniki, 54124 Thessaloniki, Greece

\* Correspondence: amarkopo@pharm.auth.gr; Tel.: +30-2310-997-665

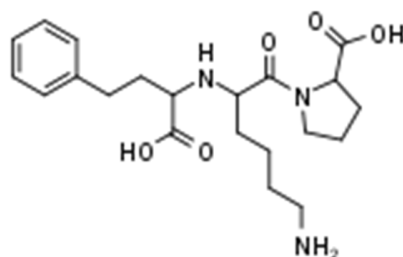

Lisinopril

Figure S1. Structural formula of lisinopril.

**Table S1.** Differences between the present approach and Boczar et al. [1] methodology.

| Proposed approach                                                                                                                                                                                                                                                                                                                                                                                    | Boczar's method [1]                                                                                                                                                                                                                                                                                                                                                                                                                                                                                           |
|------------------------------------------------------------------------------------------------------------------------------------------------------------------------------------------------------------------------------------------------------------------------------------------------------------------------------------------------------------------------------------------------------|---------------------------------------------------------------------------------------------------------------------------------------------------------------------------------------------------------------------------------------------------------------------------------------------------------------------------------------------------------------------------------------------------------------------------------------------------------------------------------------------------------------|
| <p>Extraction: Use of liquid-liquid microextraction technique for the extraction of NAs from Lisinopril.</p> <p>Low volumes of DCM and water (600 <math>\mu</math>L of each solvent) were used.</p> <p>A very simple LLME technique is suggested, using only a glass sealed syringe and an eppendorf tube.</p>                                                                                       | <p>Extraction: Use of liquid-liquid extraction technique for the extraction of NAs from Enalapril maleate.</p> <p>5 mL of DCM are used and a white homogeneous suspension was formed, then filtered through a paper filter into a 5-mL volumetric flask. The resulting solution was transferred to a separation funnel, and 5 mL of acetate buffer, pH 5.6 was added.</p> <p>Complex extraction technique including several steps and using high volume of extraction solvent.</p>                            |
| <p>Denitrosation procedure:</p> <p>20 <math>\mu</math>L of the denitrosation reagent and 600 <math>\mu</math>L of the DCM phase were used. The vial was left capped for 30 minutes at room temperature in the dark and then heated for 2 hours at 70°C to completely evaporate the DCM solvent and acids.</p> <p>Procedure duration: 150 min</p> <p>Denitrosation reagent: 20 <math>\mu</math>L.</p> | <p>Denitrosation procedure:</p> <p>50 <math>\mu</math>L of denitrosation reagent and 1 mL of DCM sample solution were used. The vials were left for 30 min at room temperature in the dark and then heated for 20 min at 60 °C. Afterwards, the vials were opened and left for 3 h at 60 °C in an oven, to completely evaporate the solvent and the acids.</p> <p>Procedure duration: 230 min</p> <p>Denitrosation reagent: 50 <math>\mu</math>L</p>                                                          |
| <p>Derivatization procedure:</p> <p>The concentration of dansyl chloride was equal to 10 <math>\mu</math>g/mL and the diluent was acetonitrile.</p> <p>In order to obtain the desired pH for derivatization, 250 <math>\mu</math>L of 25 mM borate buffer (pH 10.5) were used.</p>                                                                                                                   | <p>Derivatization procedure:</p> <p>The concentration of dansyl chloride was equal to 0.5 mg/mL and the diluent was acetone.</p> <p>In order to obtain the desired pH for derivatization 50 <math>\mu</math>L of 1-M NaOH and 200 <math>\mu</math>L of 0.5-M NaHCO<sub>3</sub> were used.</p> <p>In section 3.3, the authors concluded that dansyl chloride suffers from low sensitivity and it is contaminated from DMA, so they decided to continue their studies with Fmoc-Cl as derivatisation agent.</p> |
| <p>Dansyl-Cl:</p> <p>Derivatization duration: 30 min at 40 °C.</p> <p>Inexpensive reagent.</p>                                                                                                                                                                                                                                                                                                       | <p>F-moc:</p> <p>Derivatisation duration: 60 min at 40 °C.</p> <p>Expensive reagent.</p>                                                                                                                                                                                                                                                                                                                                                                                                                      |
| Chromatographic conditions:                                                                                                                                                                                                                                                                                                                                                                          | Chromatographic conditions:                                                                                                                                                                                                                                                                                                                                                                                                                                                                                   |

|                                                                                                                                                                                                                                    |                                                                                                                                                    |
|------------------------------------------------------------------------------------------------------------------------------------------------------------------------------------------------------------------------------------|----------------------------------------------------------------------------------------------------------------------------------------------------|
| <p>Isocratic elution program.</p> <p>mobile phase: 20 mM phosphate buffer (pH 2.8 with H<sub>3</sub>PO<sub>4</sub>) and acetonitrile 55:45 v/v</p> <p>column: LC-C18 DB 250 × 4.6 mm, 5.0 μm, Supelco</p> <p>Runtime = 13 min.</p> | <p>Gradient elution program.</p> <p>mobile phase: acetonitrile/water</p> <p>column: NovaPak C18, 150 × 3.9 mm, 4.0 μm</p> <p>Runtime = 30 min.</p> |
|------------------------------------------------------------------------------------------------------------------------------------------------------------------------------------------------------------------------------------|----------------------------------------------------------------------------------------------------------------------------------------------------|

**Table S2.** Conducted experiments and measured responses for “Crossed D-Optimal” (CDO) design.

|     | Factor 1         | Factor 2       | Factor 3         | Response 1 | Response 2 |
|-----|------------------|----------------|------------------|------------|------------|
| Run | A: V den. factor | B: deriv. time | C: deriv. temper | area NDMA  | area NDEA  |
| 1   | 25               | 30             | 40               | 60779      | 6837       |
| 2   | 25               | 30             | 40               | 57796      | 6998       |
| 3   | 25               | 30             | 40               | 56245      | 6044       |
| 4   | 25               | 45             | 40               | 57927      | 7993       |
| 5   | 25               | 30             | 40               | 46173      | 5734       |
| 6   | 40               | 45             | 50               | 56862      | 8485       |
| 7   | 40               | 30             | 40               | 58765      | 7978       |
| 8   | 25               | 30             | 40               | 54823      | 6252       |
| 9   | 25               | 30             | 30               | 58518      | 8795       |
| 10  | 10               | 45             | 50               | 58900      | 8467       |
| 11  | 25               | 30             | 40               | 54309      | 6691       |
| 12  | 40               | 15             | 50               | 57839      | 8257       |
| 13  | 25               | 15             | 40               | 57263      | 8586       |
| 14  | 10               | 30             | 40               | 56460      | 9057       |
| 15  | 25               | 30             | 50               | 58307      | 8529       |
| 16  | 40               | 15             | 30               | 52504      | 7321       |
| 17  | 40               | 45             | 30               | 60583      | 9150       |
| 18  | 10               | 45             | 30               | 61615      | 9151       |
| 19  | 10               | 15             | 50               | 58864      | 8259       |
| 20  | 10               | 15             | 30               | 60405      | 9402       |

## Reference

1. Boczar, D.; Wyszomirska, E.; Zabrzewska, B.; Chyła, A.; Michalska, K. Development and validation of a method for the semi-quantitative determination of n-nitrosamines in active pharmaceutical ingredient enalapril maleate by means of derivatisation and detection by hplc with fluorimetric detector. *Appl. Sci.* **2021**, *11*, 7590. <https://doi.org/10.3390/app11167590>.
